# Supplementary material for: Self-assembled PVP-gold nanostar films as plasmonic substrates for surface-enhanced spectroscopies: influence of the polymeric coating on the enhancement efficiency
Source: Royal Society of Chemistry journal article supplement (doi:10.1039/d3an00682d), 2023-01-01
Supplement: d3an00682d1.pdf [file d3an00682d1.pdf]

## Supplementary Information

### Self-Assembled PVP-Gold Nanostar Films as Plasmonic Substrates for Surface-Enhanced Spectroscopies: Influence of the Polymeric Coating on the Enhancement Efficiency

Andra-Sorina Tatar<sup>1</sup>, Sanda Boca<sup>2,1,\*</sup>, Alexandra Falamas<sup>1</sup>, Denisa Cuibus<sup>1</sup>, Cosmin Farcau<sup>1,\*</sup>

<sup>1</sup>National Institute for Research and Development of Isotopic and Molecular Technologies, 67–103 Donat, 400293 Cluj-Napoca, Romania

<sup>2</sup>Interdisciplinary Research Institute in Bio-Nano-Sciences, Babes-Bolyai University, 42 TreboniuLaurian, 400271 Cluj-Napoca, Romania

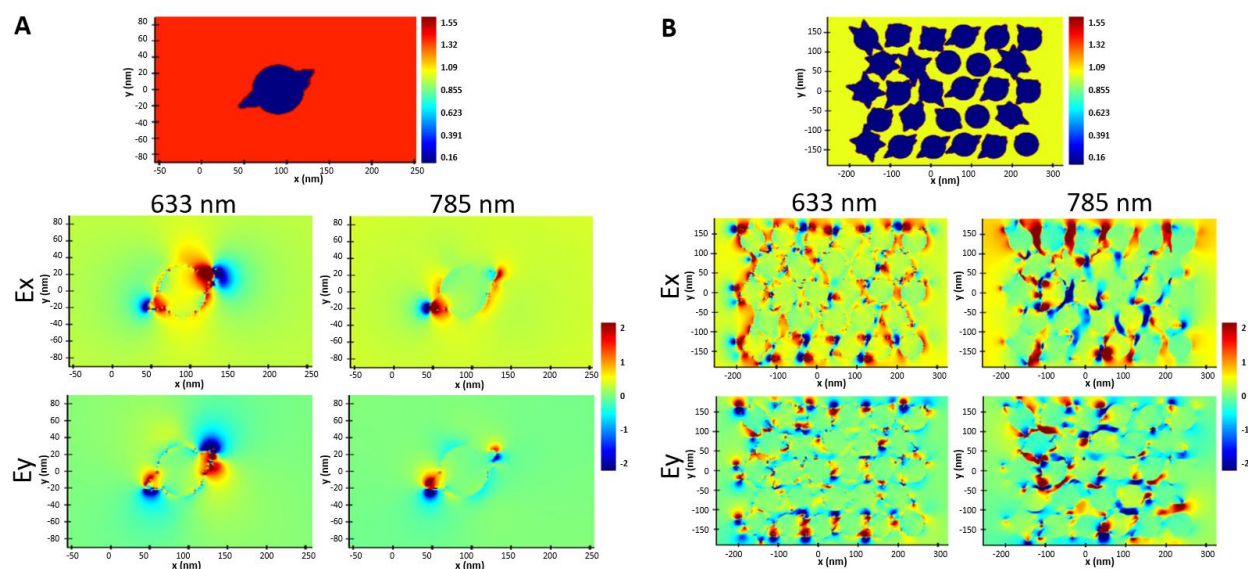

**Figure S1.**  $E_x$  and  $E_y$  electric field components for a single GNSt (A) and for aGNSts film, at 633 nm and 785 nm.

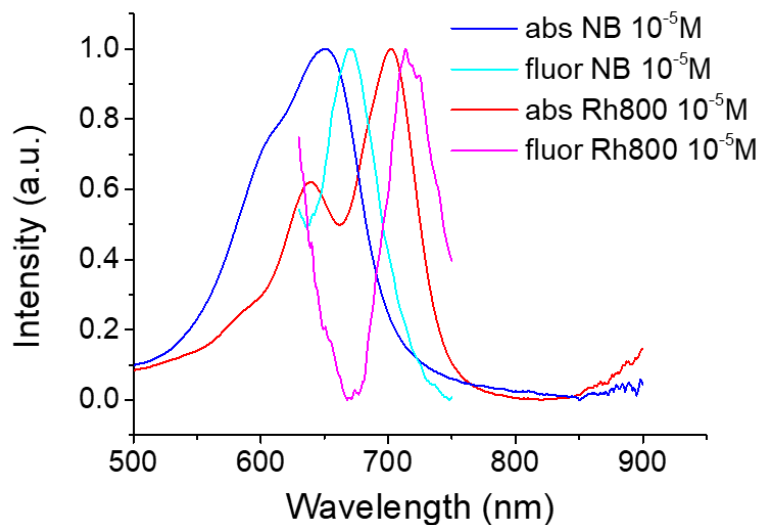

**Figure S2.** Absorption and fluorescence spectra of  $10^{-5}$  M NB and Rh800 in ethanol solution.

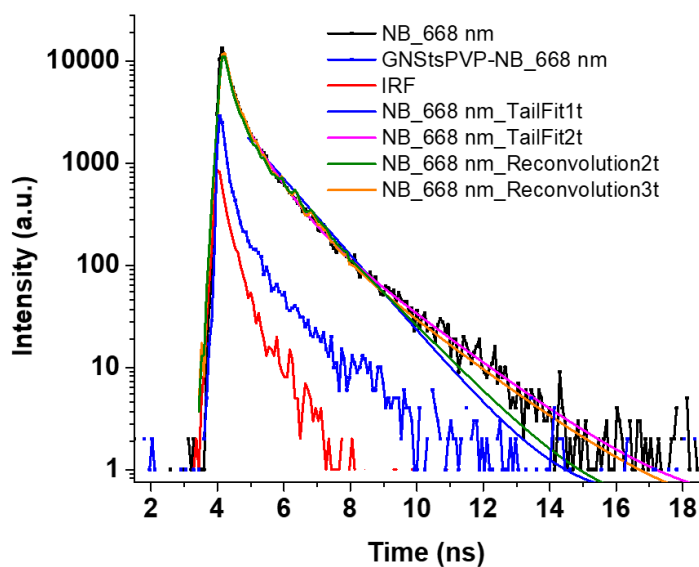

**Figure S3.** Kinetic traces recorded at 668 nm corresponding to NB in the presence and absence of the GNSts plotted together with the IRF and fitting curves obtained using the tail-fitting method with one, respectively two exponential functions and the reconvolution method with two, respectively three exponential functions.

**Table S1.** The lifetime components obtained for NB in the absence of GNSts using various fitting methods with several exponential functions.

| <b>Fitting method</b>        | <b><math>\tau_1</math> (ns)</b> | <b><math>\tau_2</math> (ns)</b> | <b><math>\tau_3</math> (ns)</b> | <b><math>\tau_{\text{avg int}}</math> (ns)</b> |
|------------------------------|---------------------------------|---------------------------------|---------------------------------|------------------------------------------------|
| Tail-fitting 1 exponential   | 1.15±0.02                       |                                 |                                 | 1.15±0.02                                      |
| Tail-fitting 2 exponentials  | 0.66±0.04                       | 1.85±0.09                       |                                 | 1.21±0.02                                      |
| Reconvolution 2 exponentials | 0.05±0.01                       | 1.32±0.03                       |                                 | 0.23±0.03                                      |
| Reconvolution 3 exponentials | 0.04±0                          | 0.67±0.13                       | 1.78±0.19                       | 0.17±0.03                                      |
